# Supplementary material for: Design principles of improving the dose-response alignment in coupled GTPase switches
Source: NPJ Syst Biol Appl. 2023 Jan 31;9:3. doi: 10.1038/s41540-023-00266-9 (PMC9889403; doi:10.1038/s41540-023-00266-9)
Supplement: Supplementary file 2 — Supplementary Information [file 41540_2023_266_MOESM2_ESM.pdf]

# **Supplementary information for “Design principles of improving the dose-response alignment in coupled GTPase switches”**

This file contains:

Supplementary Table 1

Supplementary Figure 1

Supplementary Figure 2

Supplementary Figure 3

Supplementary Figure 4

Supplementary Figure 5

Supplementary Figure 6

Supplementary Figure 7

Supplementary Figure 8

Supplementary Figure 9

**Supplementary Table 1:** Parameters used in numerical simulations

|                                                                              |                                                                                                                                                                                         |
|------------------------------------------------------------------------------|-----------------------------------------------------------------------------------------------------------------------------------------------------------------------------------------|
| Stimulus $S$                                                                 | $10^x$ , where $x$ is uniformly distributed in $[-5, 3]$ with the increment 0.2                                                                                                         |
| $k_{on}^i, i = mGEF, tGEF$                                                   | 1                                                                                                                                                                                       |
| $k_{off}^i, i = R^*, mGEF, mG^*, tGEF, tG^*, mGAP$                           | 1                                                                                                                                                                                       |
| $tGAP$                                                                       | 0.5                                                                                                                                                                                     |
| $K$                                                                          | 0.5                                                                                                                                                                                     |
| n (unless otherwise specified)                                               | 1.5                                                                                                                                                                                     |
| <b>Parameters used in Figure 2</b>                                           |                                                                                                                                                                                         |
| $k_{feedback}$                                                               | 0                                                                                                                                                                                       |
| $k_{on}^{mGAP}$                                                              | [0.01:0.02:0.1, 0.15:0.05:0.4, 0.5:0.1:1]                                                                                                                                               |
| $(k_{on}^R, k_{on}^{mG}, k_{on}^{tG})$ in the upper panel in b               | $(0.5, 10^0, 10^0)$                                                                                                                                                                     |
| $k_{on}^R, k_{on}^{mG}, k_{on}^{tG}$ in the middle and lower panels in b     | $k_{on}^R = 0.5$ .<br>$k_{on}^{mG}$ and $k_{on}^{tG}$ are $10^x$ , where $x$ is uniformly distributed in $[-2, 2]$ with the increment 0.2 in the lower panel or 0.1 in the middle panel |
| $(k_{on}^R, k_{on}^{mG}, k_{on}^{tG})$ (orange) in the upper panel in d      | $(10^{0.2}, 10^{0.2}, 1)$                                                                                                                                                               |
| $(k_{on}^R, k_{on}^{mG}, k_{on}^{tG})$ (magenta) in the upper panel in d     | $(10^{-0.8}, 10^0, 1)$                                                                                                                                                                  |
| $(k_{on}^R, k_{on}^{mG}, k_{on}^{tG})$ (purple) in the upper panel in d      | $(10^{-1.2}, 10^{-1.2}, 1)$                                                                                                                                                             |
| $k_{on}^R, k_{on}^{mG}, k_{on}^{tG}$ in the middle and lower panels in d     | $k_{on}^R$ and $k_{on}^{mG}$ are $10^x$ , where $x$ is uniformly distributed in $[-2, 2]$ with the increment 0.2.<br>$k_{on}^{tG} = 0.01, 1$ , or $10$                                  |
| <b>Parameters used in Figure 3</b>                                           |                                                                                                                                                                                         |
| $k_{on}^{mGAP}$                                                              | 0.5                                                                                                                                                                                     |
| $k_{feedback}$                                                               | 0 and $10^x$ , $x$ is uniformly distributed in $[-1, 2.6]$ with the increment 0.2                                                                                                       |
| $(k_{on}^R, k_{on}^{mG}, k_{on}^{tG})$ for the example 1 in a                | $(1, 10, 10)$                                                                                                                                                                           |
| $(k_{on}^R, k_{on}^{mG}, k_{on}^{tG})$ for the example 2 in a                | $(0.1, 10^{-0.5}, 10^{-0.5})$                                                                                                                                                           |
| $(k_{on}^R, k_{on}^{mG}, k_{on}^{tG})$ (purple) in the upper two panels in b | $(0.5, 10^{-1.4}, 10^1)$                                                                                                                                                                |

|                                                                                            |                               |
|--------------------------------------------------------------------------------------------|-------------------------------|
| $(k_{on}^R, k_{on}^{mG}, k_{on}^{tG})$ (orange) in the upper left panel in b               | $(0.5, 10^{1.4}, 10^2)$       |
| $(k_{on}^R, k_{on}^{mG}, k_{on}^{tG})$ (magenta) in the upper left panel in b              | $(0.5, 10^{0.4}, 10^1)$       |
| $(k_{on}^R, k_{on}^{mG}, k_{on}^{tG})$ (black) in the upper right panel in b               | $(0.5, 10^{-0.6}, 10^{0.6})$  |
| $(k_{on}^R, k_{on}^{mG}, k_{on}^{tG})$ (orange) in the upper right panel in b              | $(0.5, 10^1, 10^1)$           |
| $k_{on}^R, k_{on}^{mG}, k_{on}^{tG}$ in the middle and lower panels in b                   | Same as those in Figure 2b    |
| $(k_{on}^R, k_{on}^{mG}, k_{on}^{tG})$ for the example 1 in c                              | $(10^{0.4}, 10^{0.4}, 1)$     |
| $(k_{on}^R, k_{on}^{mG}, k_{on}^{tG})$ for the example 2 in c                              | $(10^{-0.6}, 10^{-0.6}, 1)$   |
| $(k_{on}^R, k_{on}^{mG}, k_{on}^{tG})$ (orange in right upper corner) in upper panels in d | $(10^{0.4}, 10^{0.4}, 1)$     |
| $(k_{on}^R, k_{on}^{mG}, k_{on}^{tG})$ (magenta) in upper panels in d                      | $(10^{-1}, 10^1, 1)$          |
| $(k_{on}^R, k_{on}^{mG}, k_{on}^{tG})$ (orange in left bottom corner) in upper panels in d | $(10^{-0.6}, 10^{-0.6}, 1)$   |
| $(k_{on}^R, k_{on}^{mG}, k_{on}^{tG})$ (black) in upper panels in d                        | $(10^1, 10^{-0.6}, 1)$        |
| $k_{on}^R, k_{on}^{mG}, k_{on}^{tG}$ in the middle and lower panels in d                   | Same as those in Figure 2d    |
| <b>Parameters used in Supplementary Figure 4 and Supplementary Figure 6</b>                |                               |
| $k_{on}^{mGAP}$                                                                            | 0.5                           |
| $(k_{on}^R, k_{on}^{mG}, k_{on}^{tG})$                                                     | $(1, 10, 10)$                 |
| $k_{feedback}$                                                                             | 1, 5, or 10                   |
| <b>Parameters used in Supplementary Figure 5 and Supplementary Figure 7</b>                |                               |
| $k_{on}^{mGAP}$                                                                            | 0.5                           |
| $(k_{on}^R, k_{on}^{mG}, k_{on}^{tG})$                                                     | $(0.1, 10^{-0.5}, 10^{-0.5})$ |
| $k_{feedback}$                                                                             | 1, 5, or 10                   |

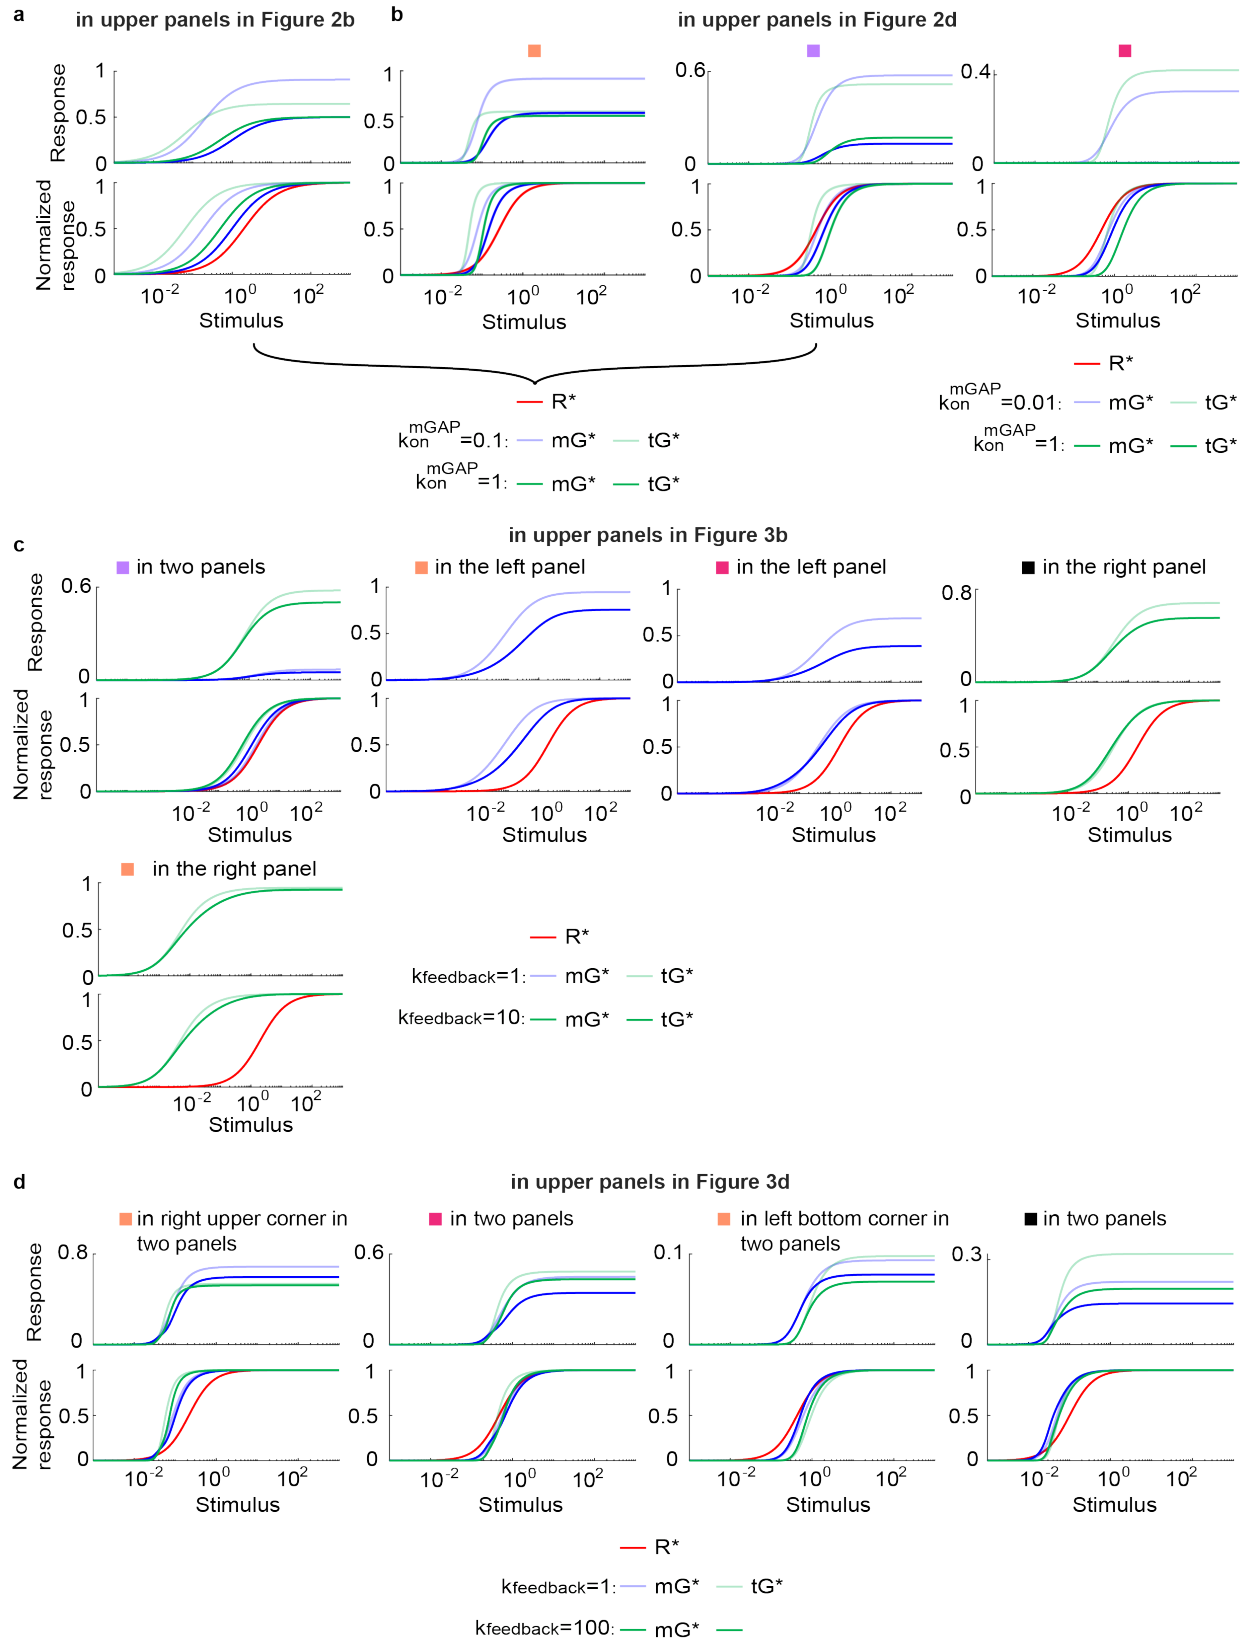

**Supplementary Figure 1: The dose-response curves for the parameter sets in Supplementary Table 1.** (a-d) Dose-response curve corresponding the kinetic parameter set used in upper panels in Figure 2b, 2d, 3b, and 3d.



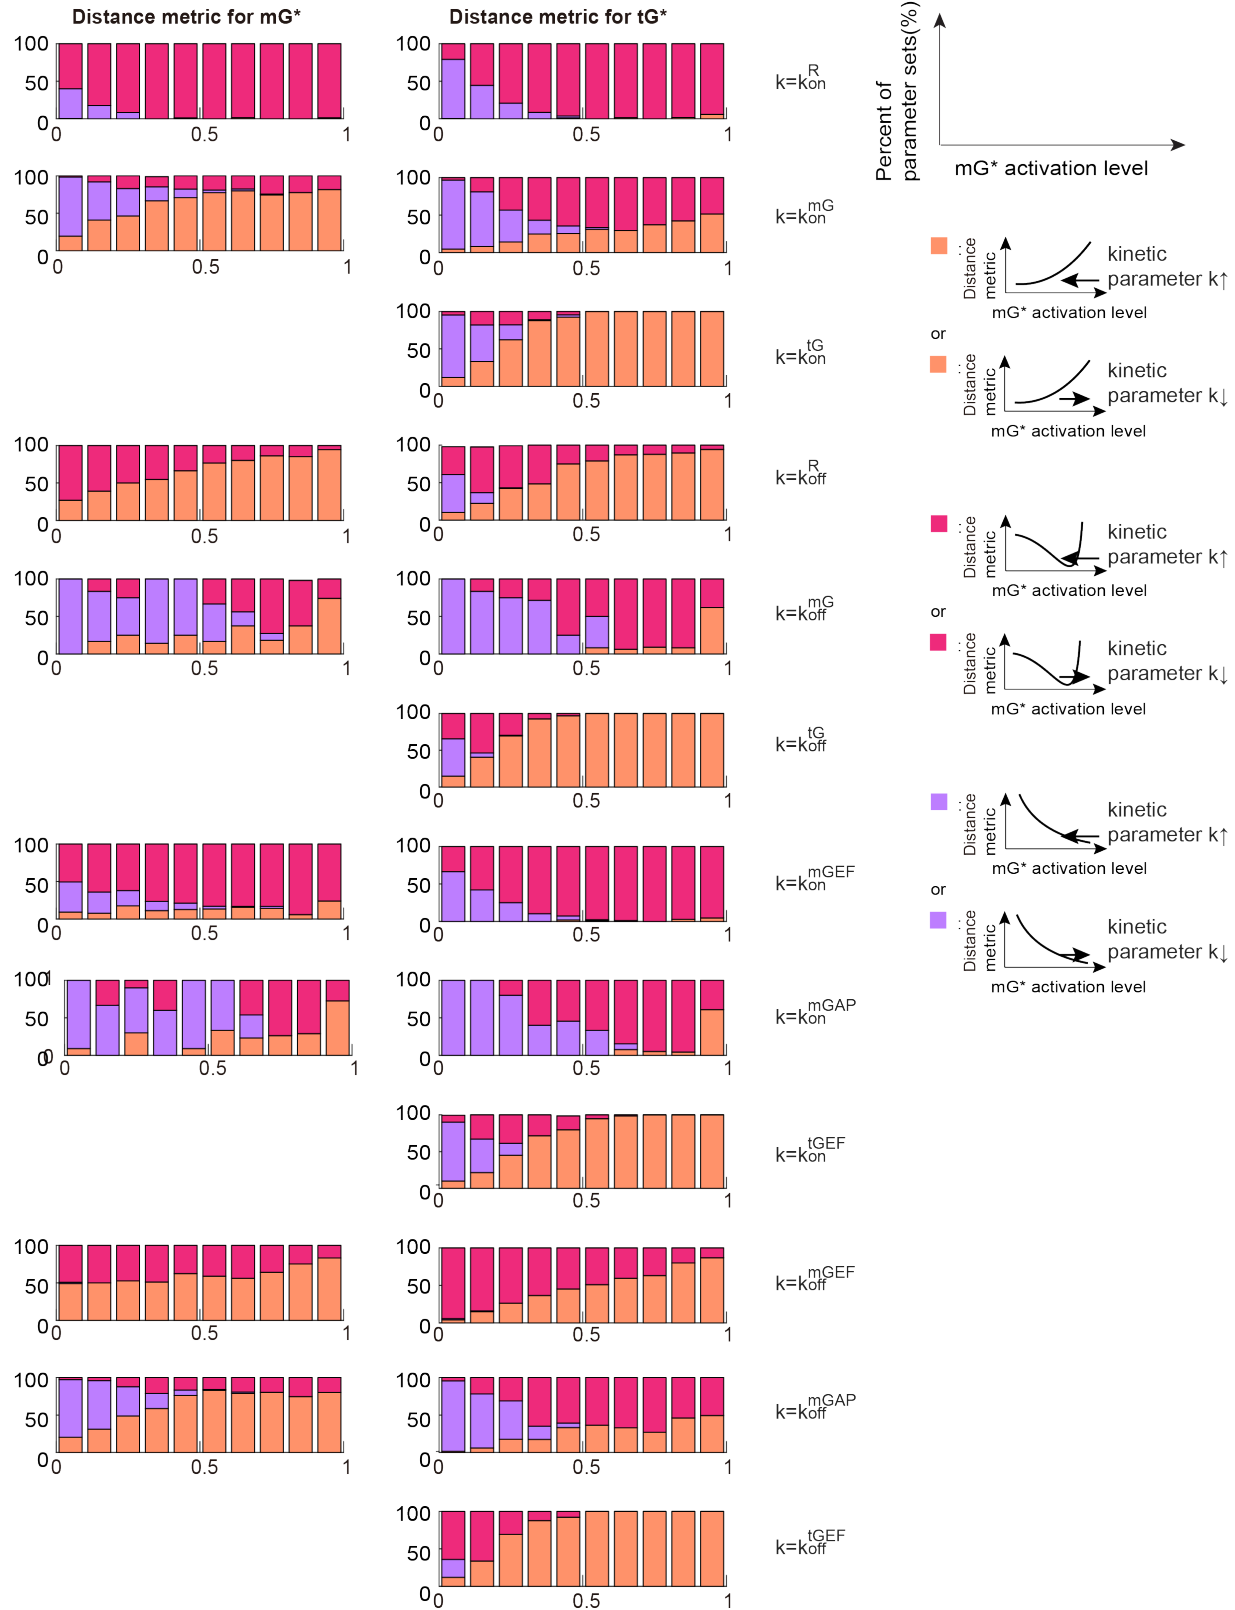

**Supplementary Figure 3: Same plot as Supplementary Figure 2 except that the Hill-function kinetics is adopted.**

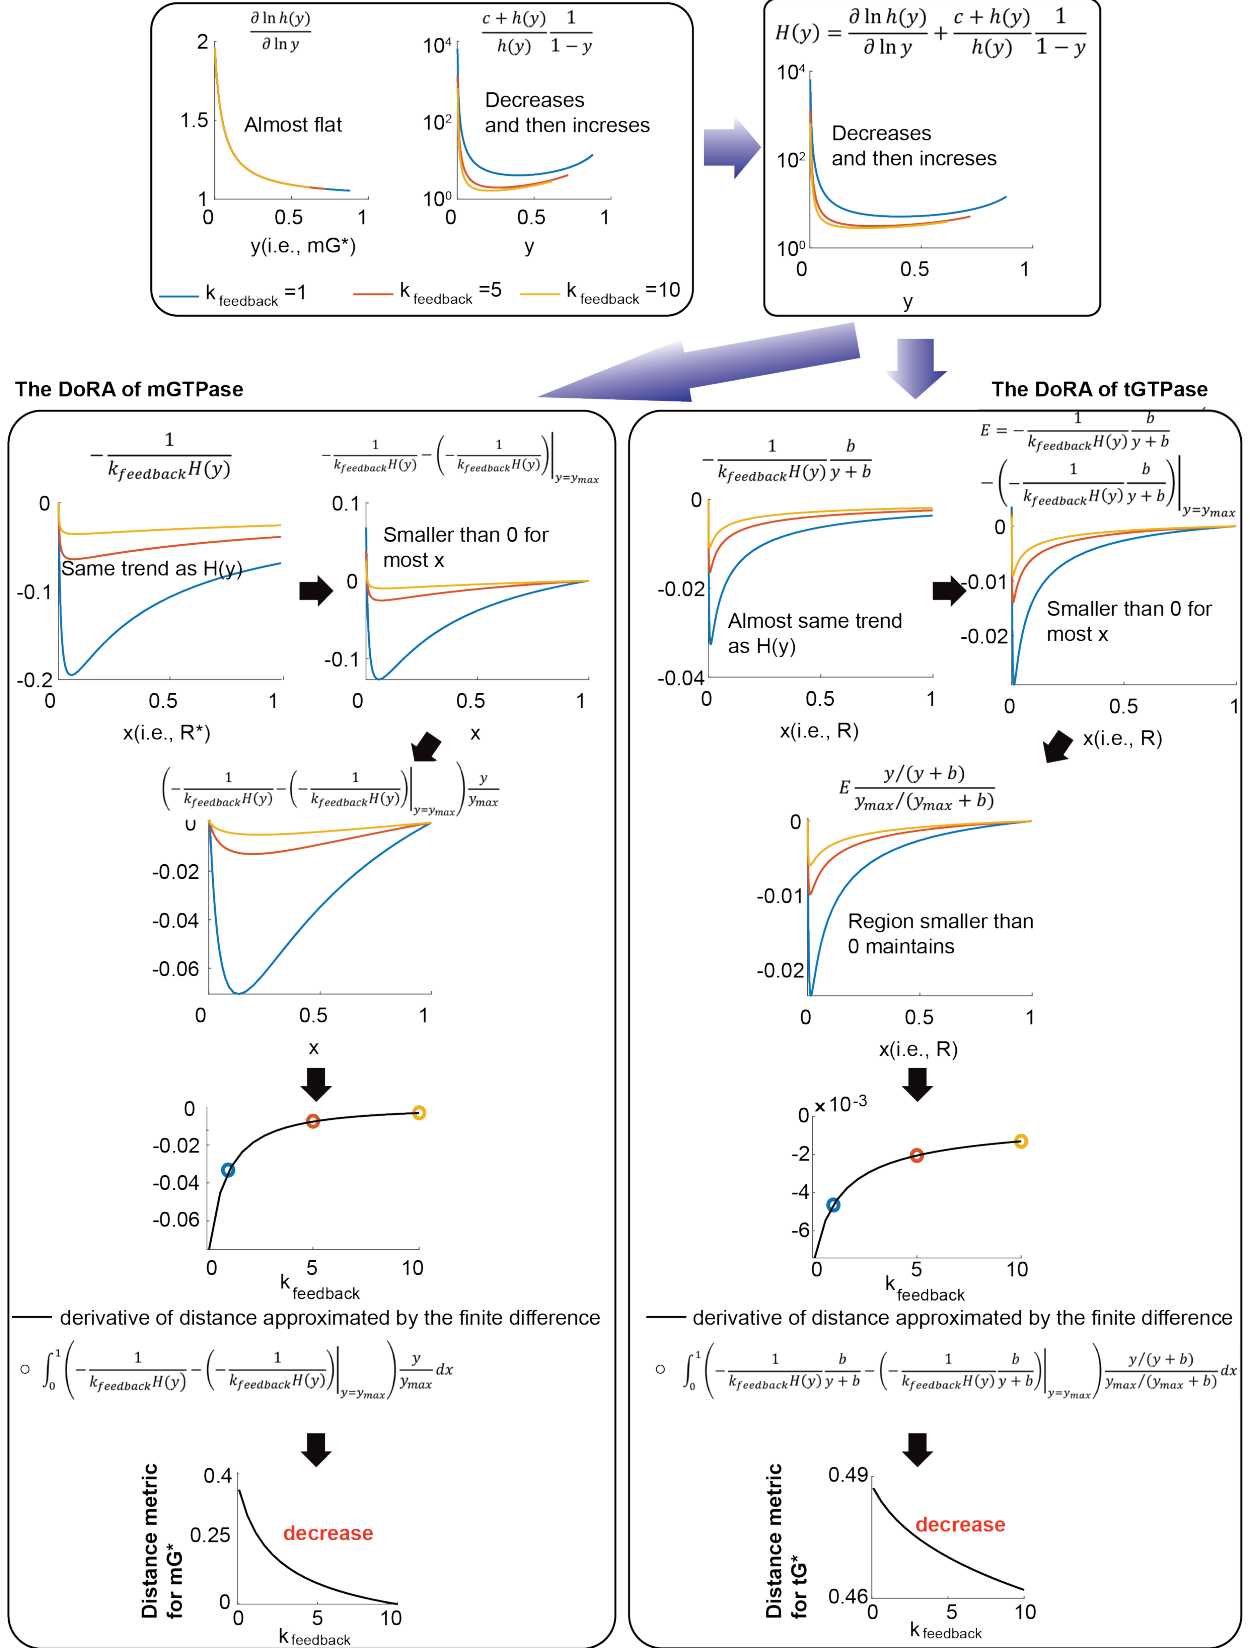

**Supplementary Figure 4: DoRA of the m- and tGTPase is improved with increased feedback strength in the mass action model. Here AND gate is applied. See Supplementary Table 1 for parameters.**

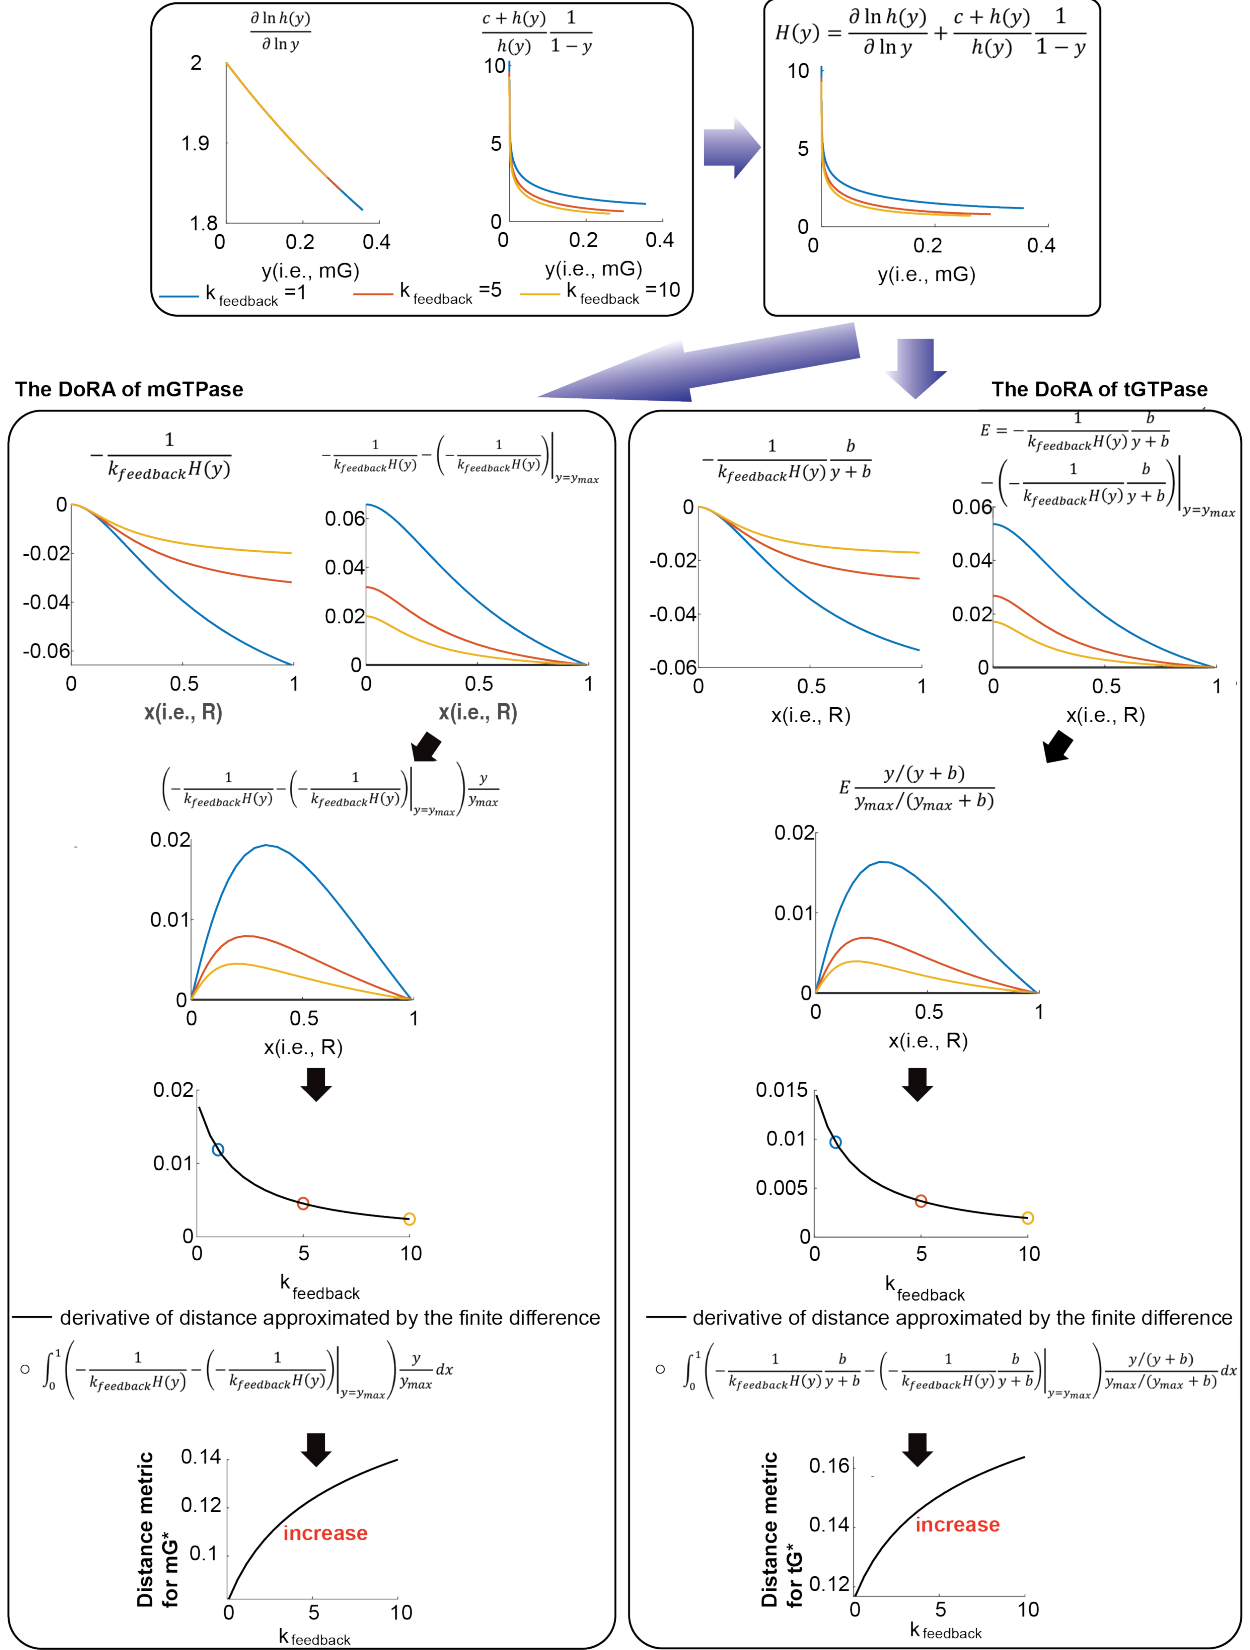

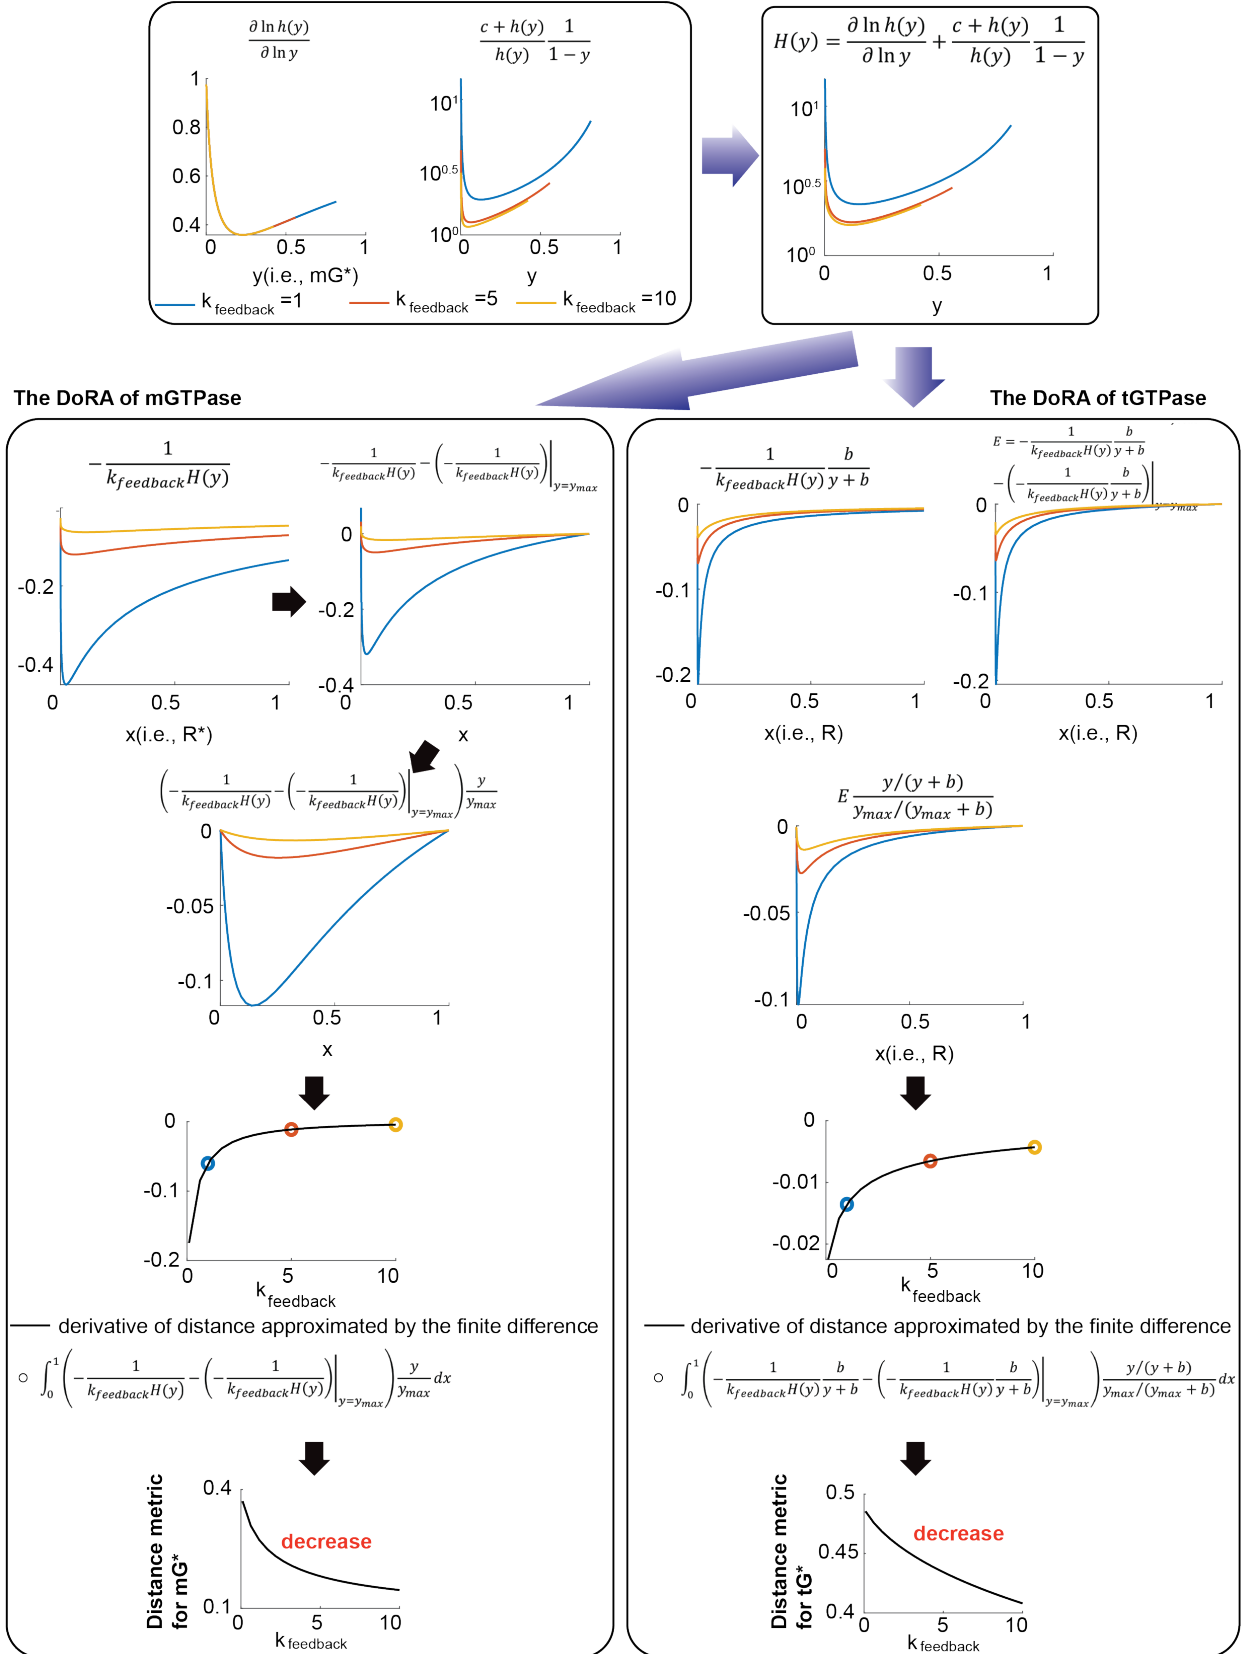

**Supplementary Figure 6: Same plot as Supplementary Figure 4 but OR logic is used to model the negative feedback. See Supplementary Table 1 for parameters.**

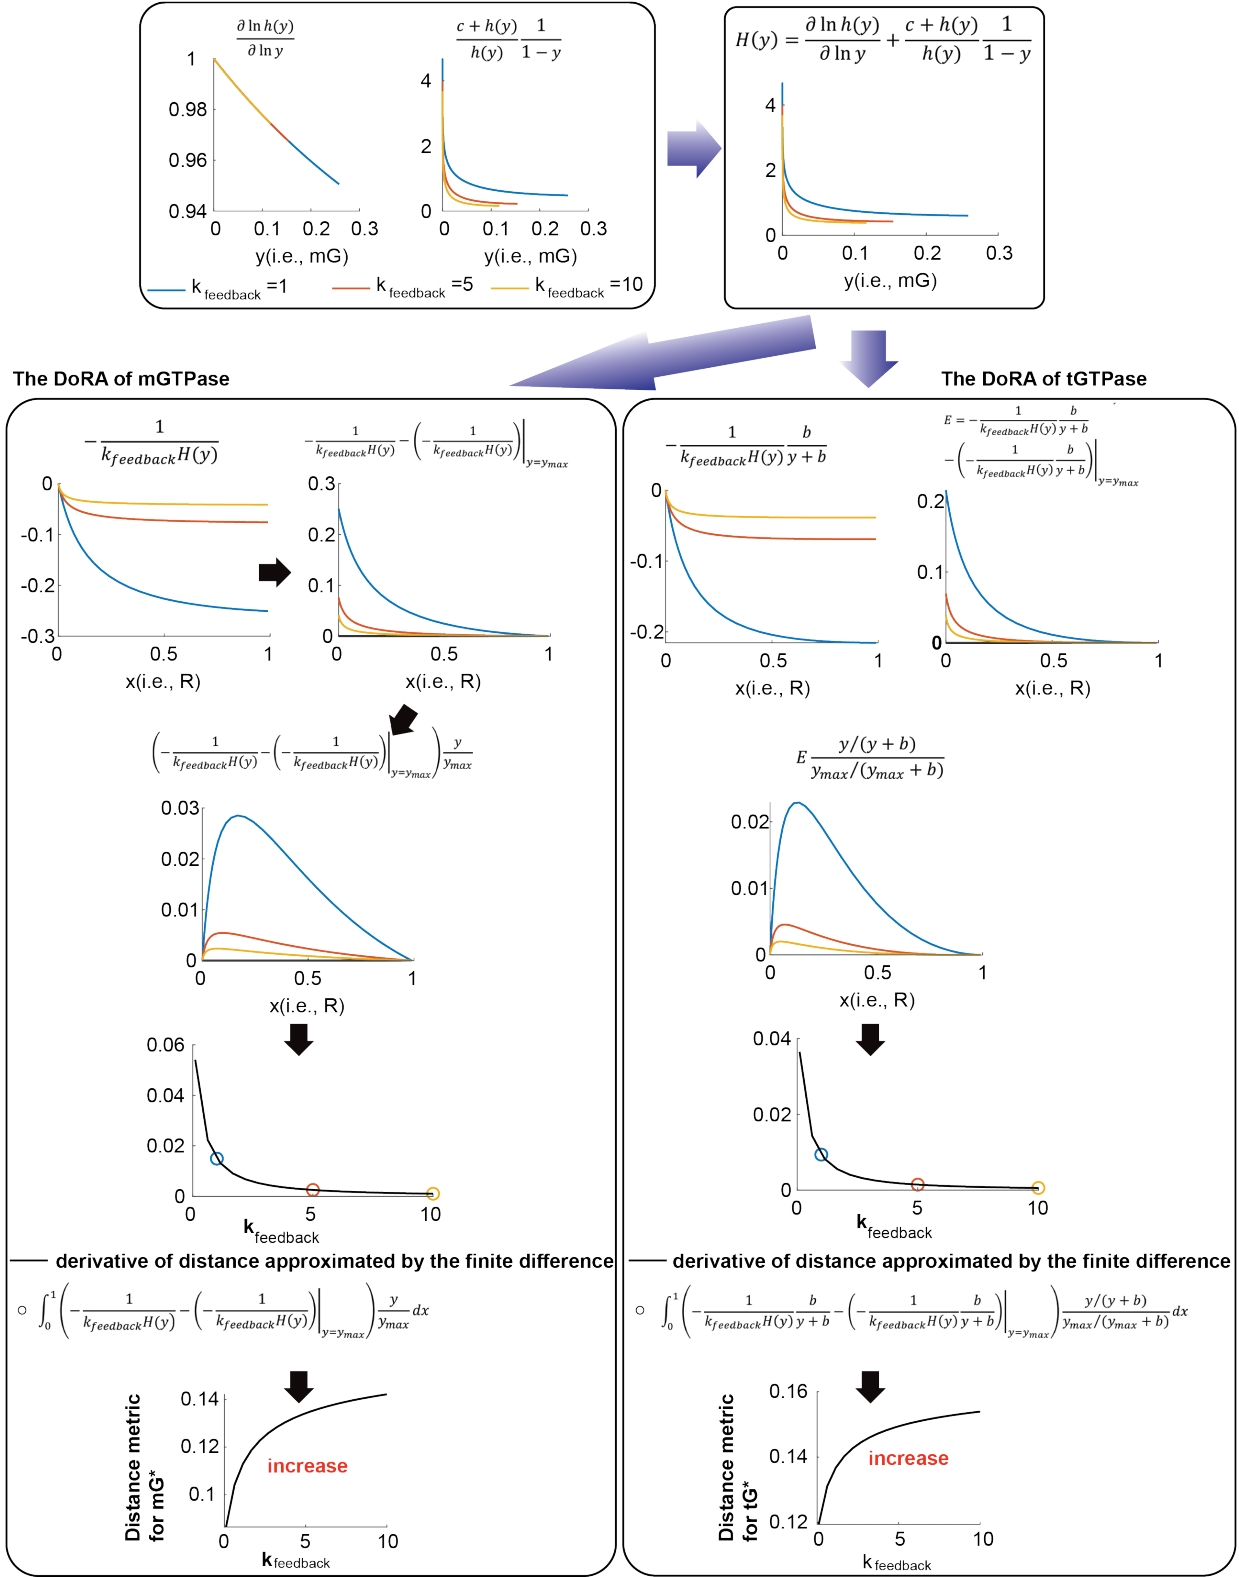

Supplementary Figure 7: Same plot as Supplementary Figure 5 but OR logic is used to model the negative feedback. See Supplementary Table 1 for parameters.

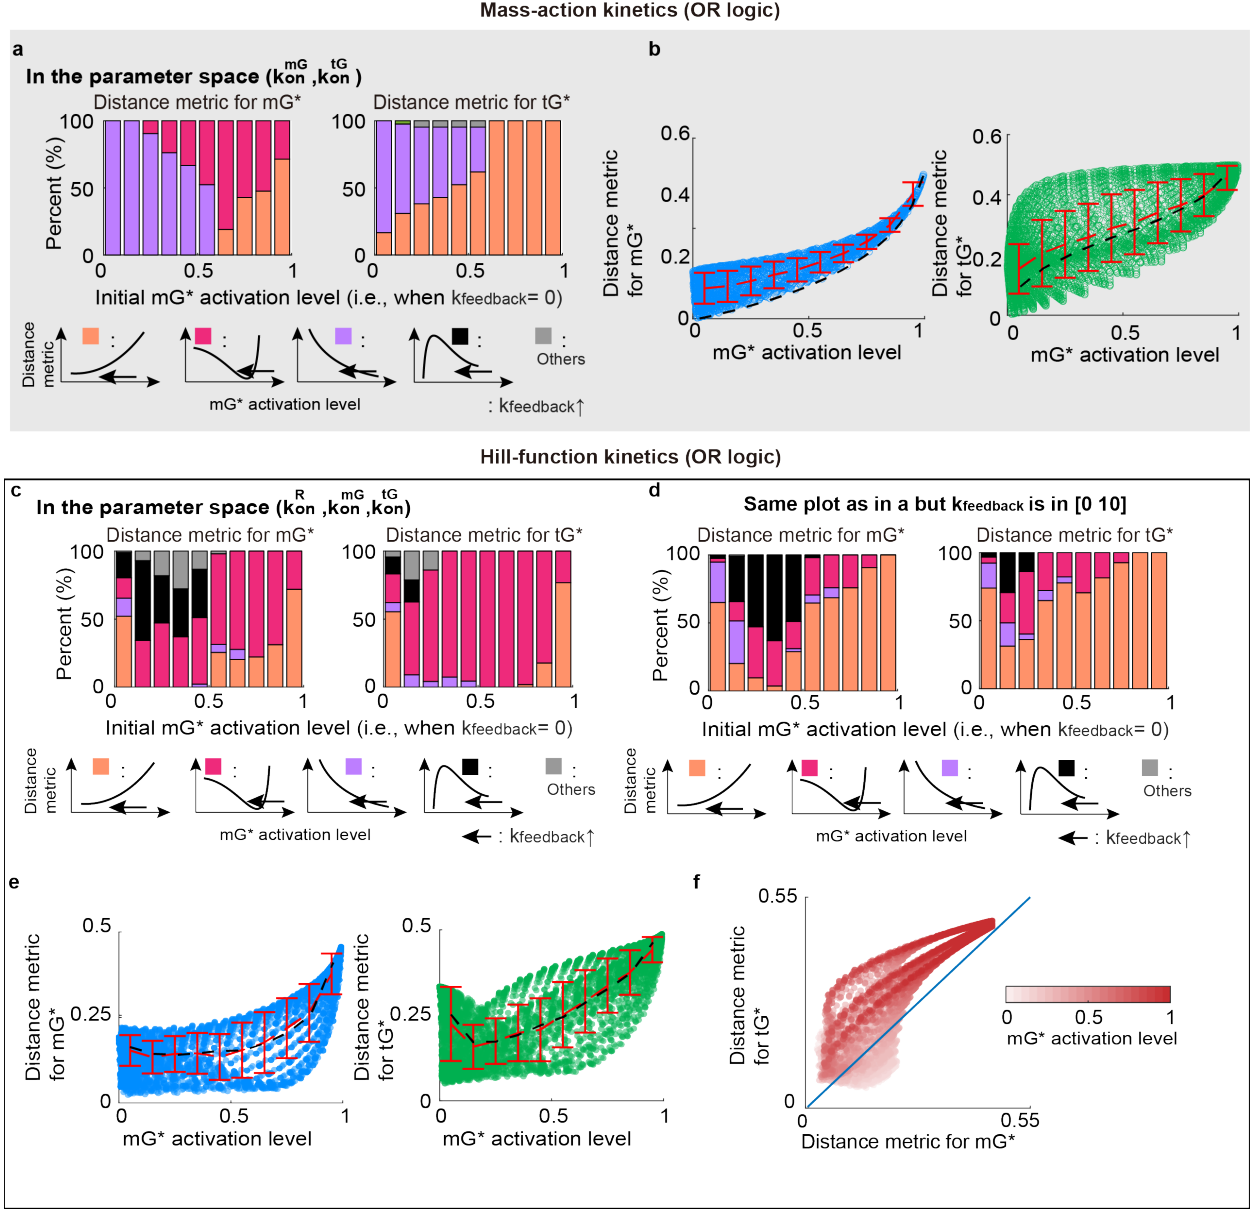

**Supplementary Figure 8: The simulation results when using OR logic gate.** (a-b) Same plot as the middle and bottom panels in Figure 3b except that OR logic is used to model the negative feedback. (c-e) Same plot as the middle and bottom panels in Figure 3d except the logic gate. The panel c and d has different ranges of  $k_{feedback}$ . (f) Same plot as the right panel in Figure 5d except the logic gate.

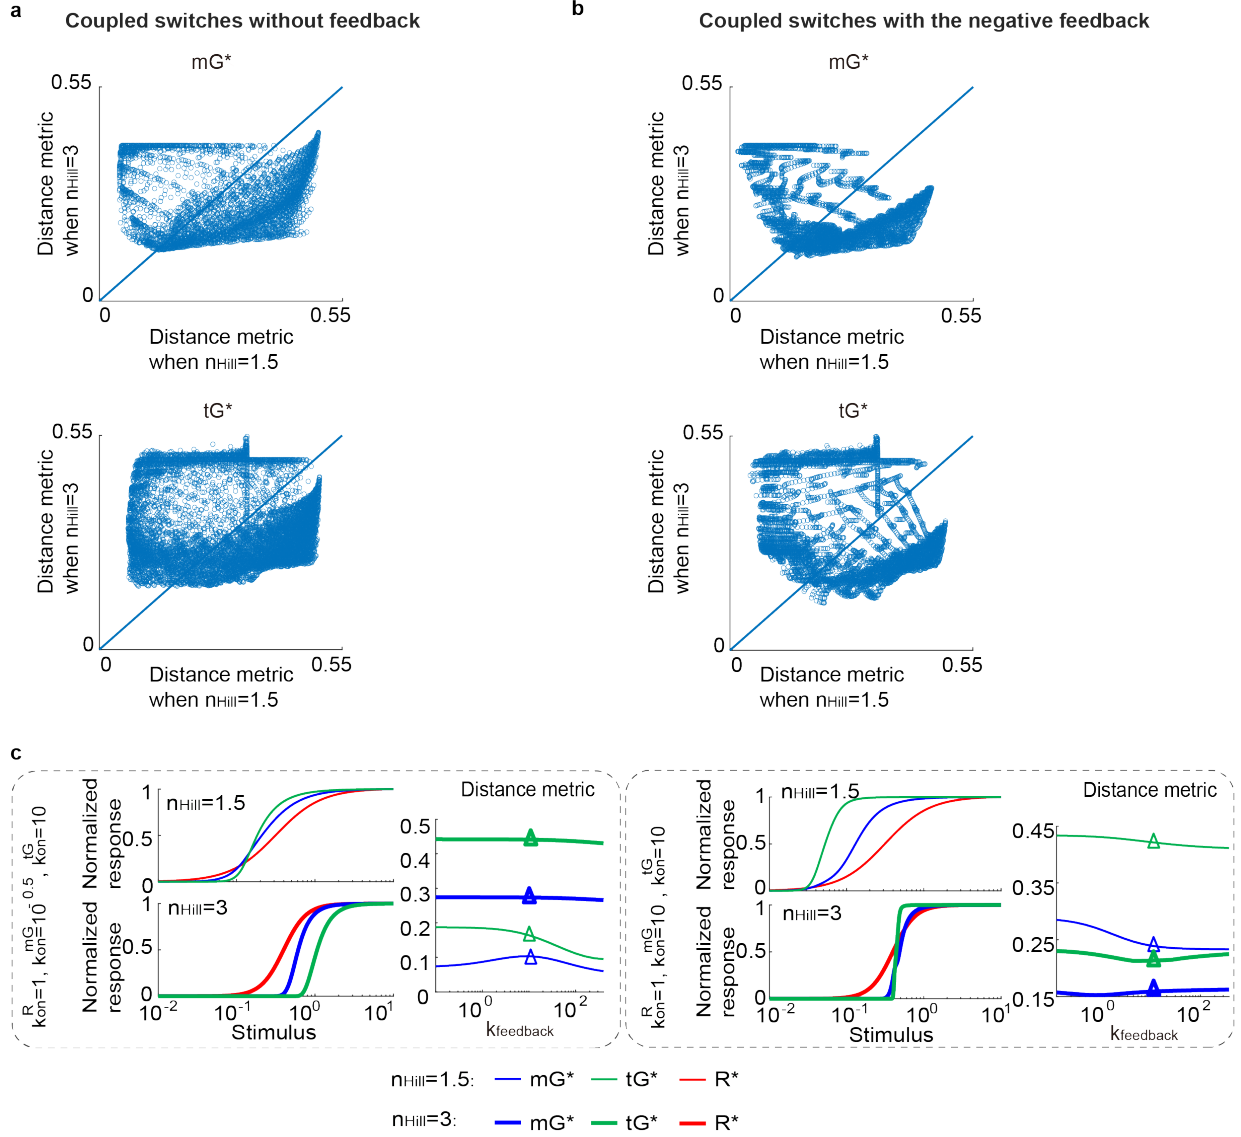

**Supplementary Figure 9: The effect of the Hill coefficient.** (a-b) The scatter plots of the distance metric with  $n_{Hill}$  1.5 versus that with  $n_{Hill}$  3 in the parameter space  $\{k_{on}^R, k_{on}^{mG}, k_{on}^{tG}\}$  for the circuit without (a) or with feedback (b). The  $n_{Hill}$  is the Hill coefficient  $n$  mentioned in the first section. (c) Two examples showing the different effects of  $n_{Hill}$  on DoRA.
